# Supplementary material for: Genomic Diversity Analyses of Some Indigenous Montenegrin Sheep Populations
Source: MDPI journal article supplement (doi:10.3390/d15050640), 2023-05-09
Supplement: s1 [file s1]

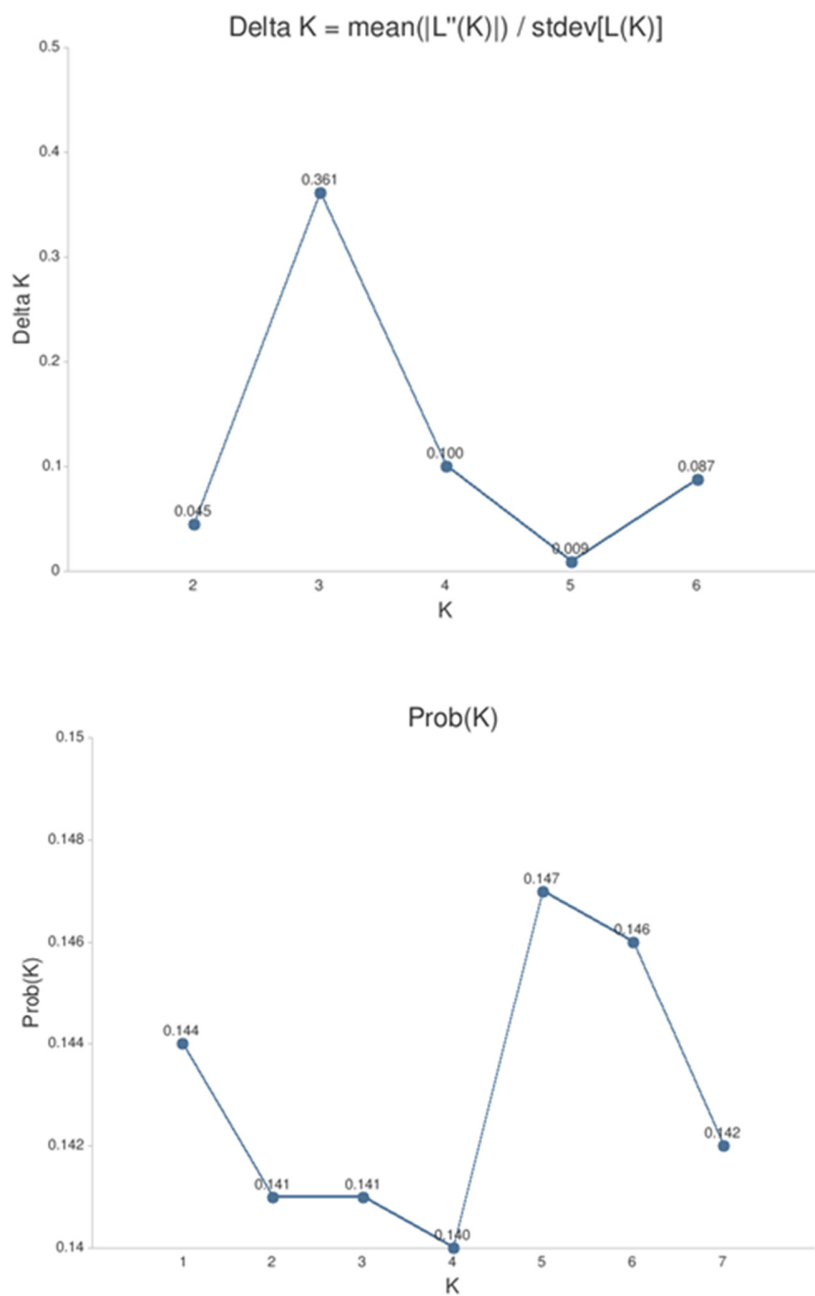

**Figure S2.** Plots generated in Clumpak show the mean log likelihood of the data  $[L(K)]$  and Evanno's delta K statistic for the Montenegrin dataset.
