# Supplementary material for: Genomic Diversity Analyses of Some Indigenous Montenegrin Sheep Populations
Source: MDPI journal article supplement (doi:10.3390/d15050640), 2023-05-09
Supplement: s1 [file s1]

Archive with 6 entries (6 files):
- Supplementary Figure S1_DeltaK_datasetII.pdf
- Supplementary Figure S2_DeltaK_datasetI.pdf
- Supplementary Figure S3_Principal Component Analysis.pdf
- Supplementary Figure S4_NeighborNet network_MNE.pdf
- Supplementary Table S1_Description of breed.pdf
- Supplementary Table S2_Dataset.pdf
