# Supplementary material for: Genomic Diversity Analyses of Some Indigenous Montenegrin Sheep Populations
Source: MDPI journal article supplement (doi:10.3390/d15050640), 2023-05-09
Supplement: s1 [file s1 › Supplementary Figure S3_Principal Component Analysis.pdf]

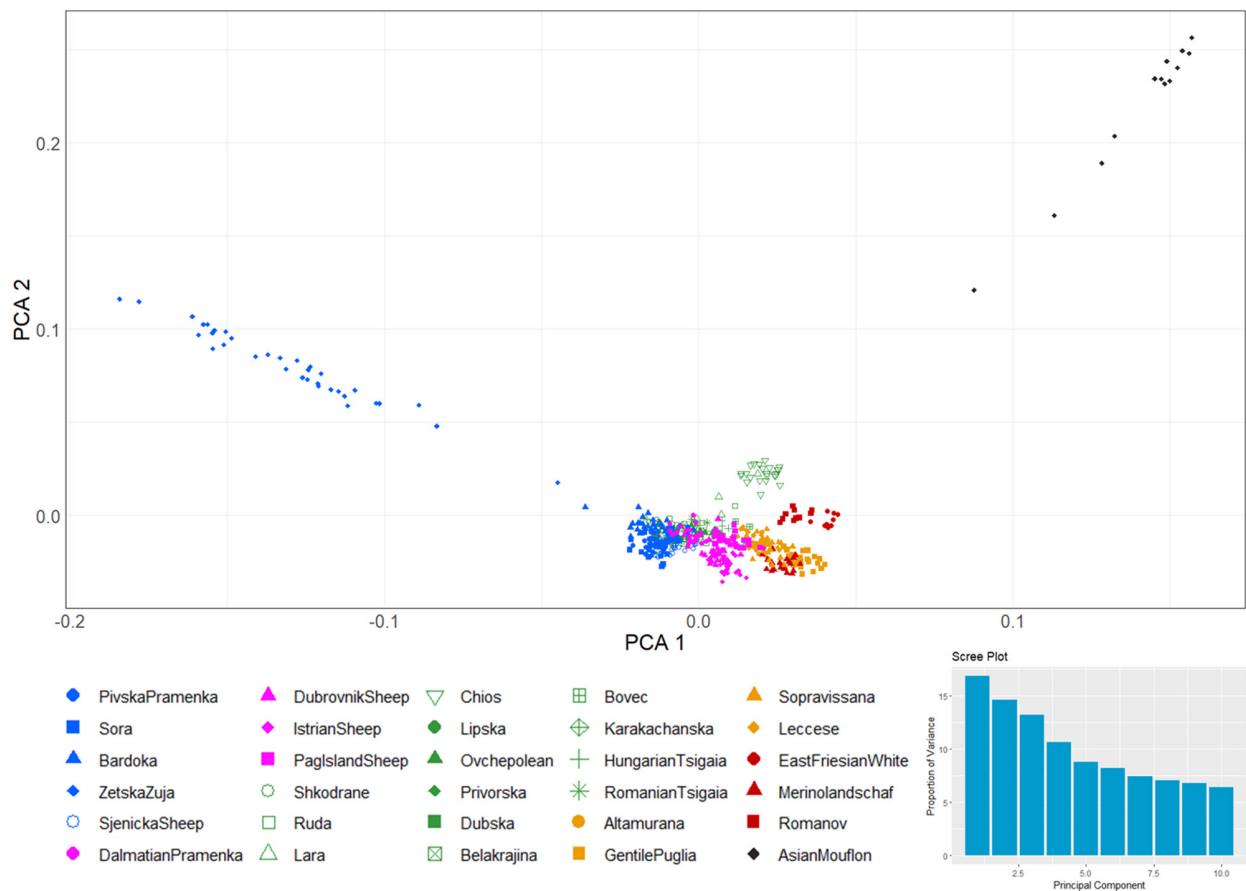

**Figure S3.** Principal component analysis (PCA) of the Montenegrin and other European sheep populations and Asian Muflon. Bar plot visualisation of the contribution of discriminant functions explaining sample variation. The breeds shown are: Montenegro - Pivska Pramenka, Sora, Bardoka, Zetska Zuja, Sjenicka Sheep; Croatia – Dalmatian Pramenka, Dubrovnik Sheep, Istrian Sheep, Pag Island Sheep; Albania – Shkodrane, Ruda, Lara; Macedonia – Ovchepolean, Karakachanska; Serbia – Lipska; Bosnia - Dubaska, Privorska; Lika; Slovenian - Belakrajina, Bovec; Hungari – Hungarian Tshigaia; Romania – Romanian Tsigiaia; Greece - Chios; Italy - Altamurana, Gentlie di Puglia, Sopravissana, Leccese; France - Merinolandschaf, Romanov, East Friesian White; and Asian Muflon.
