# Supplementary material for: Genomic Diversity Analyses of Some Indigenous Montenegrin Sheep Populations
Source: MDPI journal article supplement (doi:10.3390/d15050640), 2023-05-09
Supplement: s1 [file s1 › Supplementary Figure S4_NeighborNet network_MNE.pdf]

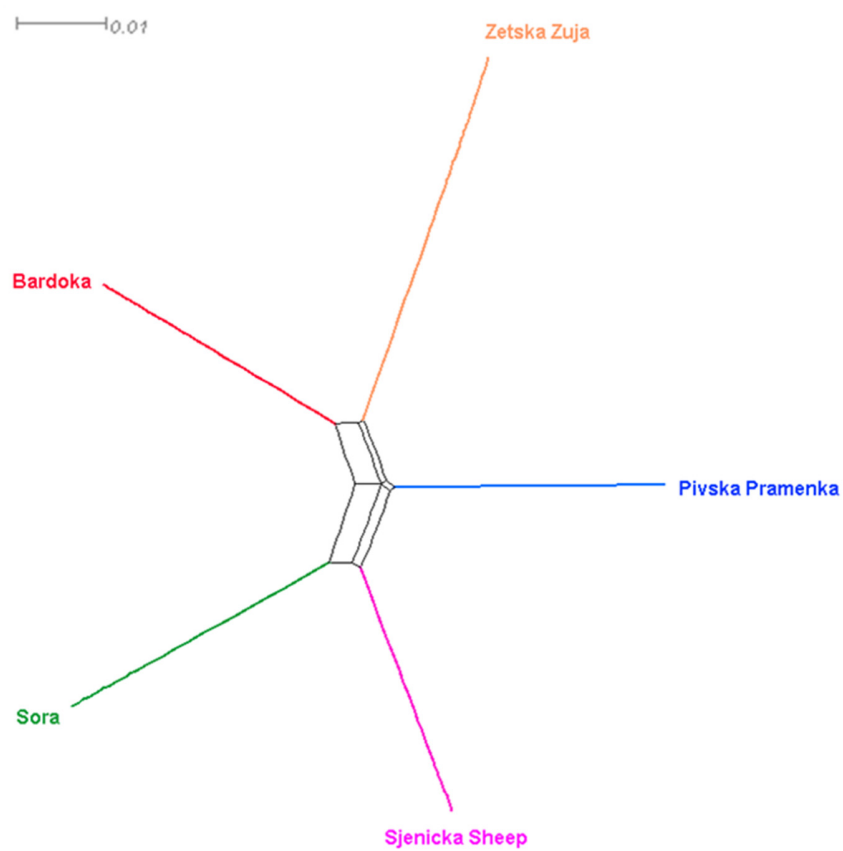

**Figure S4.** Neighbor-Net network inferred from pairwise Nei's genetic distances among in five Montenegrin sheep population.
