# Supplementary material for: Genomic Diversity Analyses of Some Indigenous Montenegrin Sheep Populations
Source: MDPI journal article supplement (doi:10.3390/d15050640), 2023-05-09
Supplement: s1 [file s1 › Supplementary Table S1_Description of breed.pdf]

**Table S1.** Short description of the five studied sheep breeds of the Montenegro

| <b>Breed</b>           | <b>Characteristics</b>                        |                                 |                                                        |                                                                                                                                     |                                      |
|------------------------|-----------------------------------------------|---------------------------------|--------------------------------------------------------|-------------------------------------------------------------------------------------------------------------------------------------|--------------------------------------|
|                        | <b>Type of sheep</b>                          | <b>Type according to origin</b> | <b>Production type</b>                                 | <b>Phenotype characteristic</b>                                                                                                     | <b>Breeding region in Montenegro</b> |
| <b>Bardoka</b>         | Group of coarse wool sheep - Pramenka, Zackel | Local breed                     | Combined production characteristics (meat, milk, wool) | The fully white-colored breed with very coarse wool and long fleece                                                                 | On border region of Albania state    |
| <b>Pivska Pramenka</b> | Group of coarse wool sheep - Pramenka, Zackel | Autochthonous breeds            | Combined production characteristics (meat, milk, wool) | Coarse wool, horned sheep (male and female), irregular black spots on the face                                                      | Northwest region                     |
| <b>Sjenicka Sheep</b>  | Group of coarse wool sheep - Pramenka, Zackel | Local breed                     | Combined production characteristics (meat, milk, wool) | The largest body size of all Montenegrin sheep breeds, characterized by the black rings about the eyes, mouth and half of the ears. | North and central region             |
| <b>Sora</b>            | Group of coarse wool sheep - Pramenka, Zackel | Autochthonous breeds            | Combined production characteristics (meat, milk, wool) | Long tail breed, white wool, only rams horned, black pointed face and legs                                                          | Northeast region                     |
| <b>Zetska Zuja</b>     | Group of coarse wool sheep - Pramenka, Zackel | Autochthonous breeds            | Combined production characteristics (meat, milk, wool) | A short tail sheep breed with small body size, reddish colored hair of face and legs.                                               | South and central region             |
