# Supplementary material for: Genomic Diversity Analyses of Some Indigenous Montenegrin Sheep Populations
Source: MDPI journal article supplement (doi:10.3390/d15050640), 2023-05-09
Supplement: s1 [file s1 › Supplementary Table S2_Dataset.pdf]

**Table S2.** Information on the joint dataset, which includes the Montenegrin sheep breeds and publicly available data of sheep breeds used in this study

| Breed              | Code of breed | Country, Region of sample collection | Type of sheep    | Number of sheep | Number of SNPs (filtering) | Source of data      |
|--------------------|---------------|--------------------------------------|------------------|-----------------|----------------------------|---------------------|
| Pivska Pramenka    | PP            | Montenegro, Balkans                  | Zackel, Pramenka | 30              | 45388                      | Our source          |
| Bardoka            | B             | Montenegro, Balkans                  | Zackel, Pramenka | 29              | 45388                      | Our source          |
| Zetska Zuja        | ZZ            | Montenegro, Balkans                  | Zackel, Pramenka | 29              | 35469                      | Our source          |
| Sora               | SO            | Montenegro, Balkans                  | Zackel, Pramenka | 23              | 35469                      | Our source          |
| Sjenicka Sheep     | S             | Montenegro, Balkans                  | Zackel, Pramenka | 28              | 35469                      | Our source          |
| Zetska Zuja        | ZUJ           | Montenegro, Balkans                  | Zackel, Pramenka | 5               | 44430                      | Ciani et al., 2020  |
| Pivska Pramenka    | PIV           | Montenegro, Balkans                  | Zackel, Pramenka | 6               | 44430                      | Ciani et al., 2020  |
| Sora               | SOR           | Montenegro, Balkans                  | Zackel, Pramenka | 6               | 44430                      | Ciani et al., 2020  |
| Pag Island Sheep   | PIS           | Croatia, Balkans                     | Zackel, Pramenka | 25              | 470962                     | Drzaic et al., 2022 |
| Istrian Sheep      | IPS           | Croatia, Balkans                     | Zackel, Pramenka | 25              | 470962                     | Drzaic et al., 2022 |
| Dalmatian Pramenka | DPS           | Croatia, Balkans                     | Zackel, Pramenka | 25              | 470962                     | Drzaic et al., 2022 |
| Dubrovnik Sheep    | DRS           | Croatia, Balkans                     | Zackel, Pramenka | 26              | 470962                     | Drzaic et al., 2022 |
| Karakachanska      | KCH           | North Macedonia, Balkans             | Zackel, Pramenka | 6               | 44430                      | Ciani et al., 2020  |
| Ovchepolean        | OVC           | North Macedonia, Balkans             | Zackel, Pramenka | 10              | 44430                      | Ciani et al., 2020  |
| Lipska             | LIP           | Serbia, Balkans                      | Zackel, Pramenka | 7               | 44430                      | Ciani et al., 2020  |
| Lara               | LAR           | Albania, Balkans                     | Albanian Zackel  | 9               | 44430                      | Ciani et al., 2020  |
| Ruda               | RUD           | Albania, Balkans                     | Zackel, Ruda     | 16              | 44430                      | Ciani et al., 2020  |
| Shkodrane          | SKO           | Albania, Balkans                     | Albanian Zackel  | 10              | 44430                      | Ciani et al., 2020  |
| Dubska             | DUB           | Bosnia, Balkans                      | Zackel, Pramenka | 2               | 44430                      | Ciani et al., 2020  |

|                               |      |                        |                       |    |        |                                        |
|-------------------------------|------|------------------------|-----------------------|----|--------|----------------------------------------|
| Privorska                     | PVO  | Bosnia, Balkans        | Zackel, Pramenka      | 2  | 44430  | Ciani et al., 2020                     |
| Bela Krajina                  | BKR  | Slovenia, Balkans      | Zackel, Pramenka      | 5  | 44430  | Ciani et al., 2020                     |
| Bovec                         | BOV  | Slovenia, Balkans      | Zackel                | 5  | 44430  | Ciani et al., 2020                     |
| Romanian Tsigai               | TSIR | Romania, Balkans       | Zackel, Tsigai        | 6  | 44430  | Ciani et al., 2020                     |
| Hungarian Tsigai              | TSIH | Hungary, Balkans       | Zackel, Tsigai        | 6  | 44430  | Ciani et al., 2020                     |
| Chios                         | CHI  | Greece, East-Aegean    | Semi-fat-tailed       | 23 | 44430  | Ciani et al., 2020; Kijas et al., 2012 |
| Altamura                      | ALT  | Italy, South part      | Moscia (Zackel)       | 19 | 44430  | Ciani et al., 2020; Kijas et al., 2012 |
| Leccese                       | LEC  | Italy, South part      | Moscia (Zackel)       | 19 | 44430  | Ciani et al., 2020; Kijas et al., 2012 |
| Gentile di Puglia             | GEN  | Italy, South part      | Merino                | 24 | 44430  | Ciani et al., 2020; Ciani et al., 2014 |
| Sopravissana                  | SOP  | Italy, South part      | Merino                | 24 | 44430  | Ciani et al., 2020; Ciani et al., 2014 |
| East Friesian White           | EFW  | Germany, Northern part | O. Aries, dairy sheep | 9  | 49034  | HapMap dataset (50KSNP)                |
| Merinolandschaf (Württemberg) | MLA  | Germany, Southern part | Merino                | 21 | 49034  | HapMap dataset (50KSNP)                |
| Romanov                       | ROM  | France (Russia)        | O. Aries              | 10 | 527823 | Rochus et al., 2018                    |
| Asiatic mouflon               | AMF  | Unknown                | O. orientalis         | 13 | 44430  | Ciani et al. 2020                      |
