# Supplementary figures and images for: Genomic Diversity Analyses of Some Indigenous Montenegrin Sheep Populations
Source: MDPI journal article supplement (doi:10.3390/d15050640), 2023-05-09

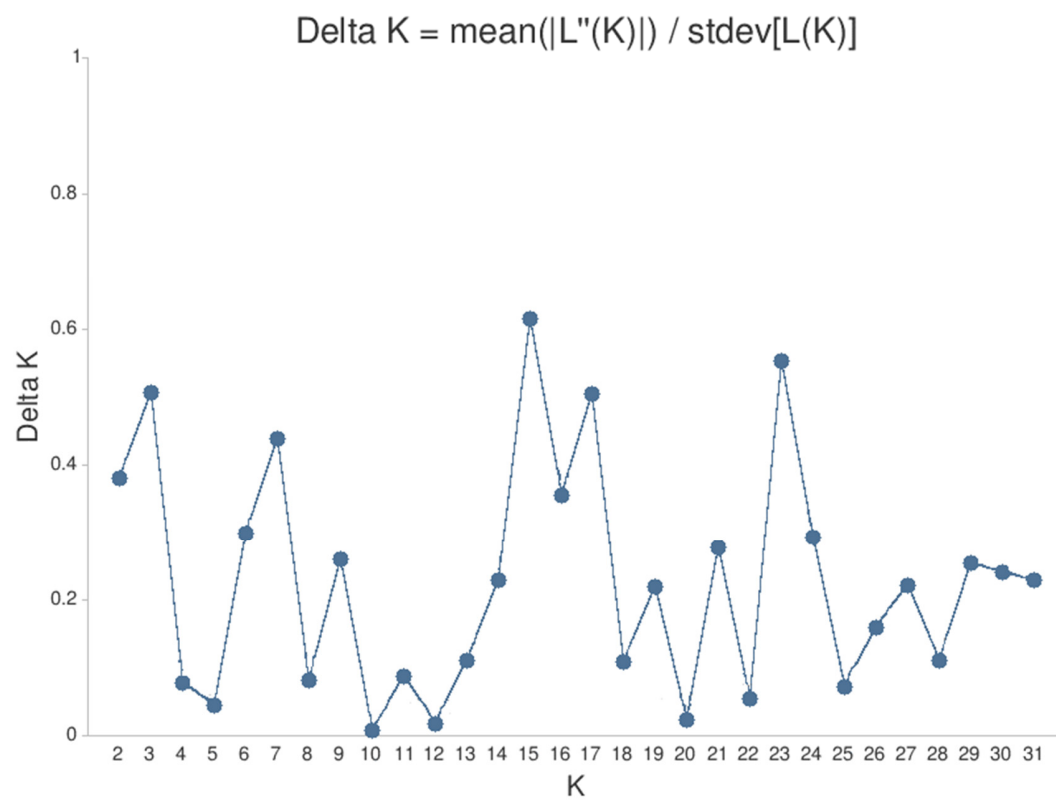

**Figure S1.** Plots generated in Clumpak that show the Evanno's delta K statistic.

Supplement: s1 [file s1 › Supplementary Figure S1_DeltaK_datasetII.pdf]
